# Supplementary material for: Kinetics and mechanistic investigation into the degradation of naproxen by a UV/chlorine process
Source: Royal Society of Chemistry journal article supplement (doi:10.1039/c7ra04540a), 2017-01-01
Supplement: c7ra04540a1.pdf [file c7ra04540a1.pdf]

**Supplementary Information**

**for**

**Kinetics and mechanistic investigation into the degradation of naproxen by  
UV/chlorine process**

Yu-qiong Gao<sup>\*a</sup>, Nai-yun Gao<sup>b</sup>, Wen-hai Chu<sup>b</sup>, Qin-lin Yang<sup>a</sup>, Da-qiang Yin<sup>b</sup>

<sup>a</sup>School of Environment and Architecture, University of Shanghai for Science and Technology,  
Shanghai 200093, China

<sup>b</sup>State Key Laboratory of Pollution Control and Resource Reuse, Key Laboratory of Yangtze  
River Water Environment, Ministry of Education, College of Environmental Science and  
Engineering, Tongji University, Shanghai 200092, China

\*Corresponding author: Yu-qiong Gao

E-mail address: [gaoyq@usst.edu.cn](mailto:gaoyq@usst.edu.cn)

Tel.: +86 21 55275979

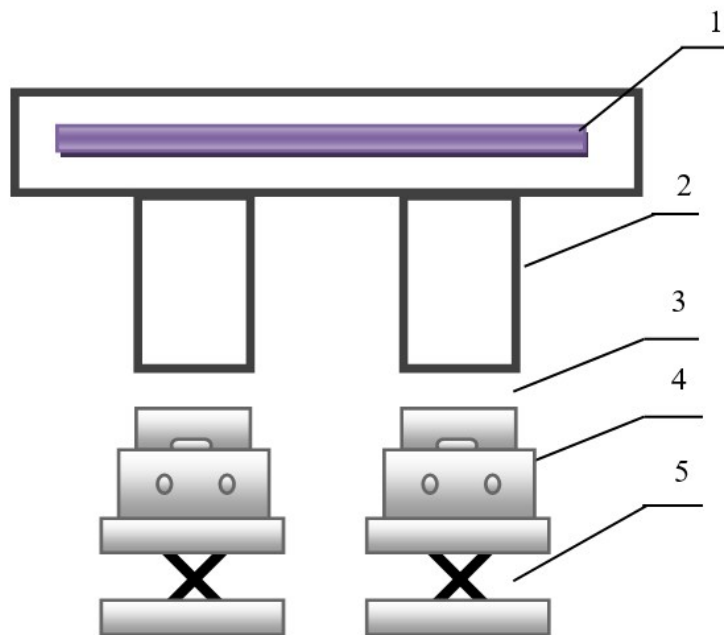

Fig. S1. Schematic description of the reactor

(1. UV lamp; 2. Lampshade; 3. Reaction dish; 4. Magnetic stirrer; 5. Rest pier)

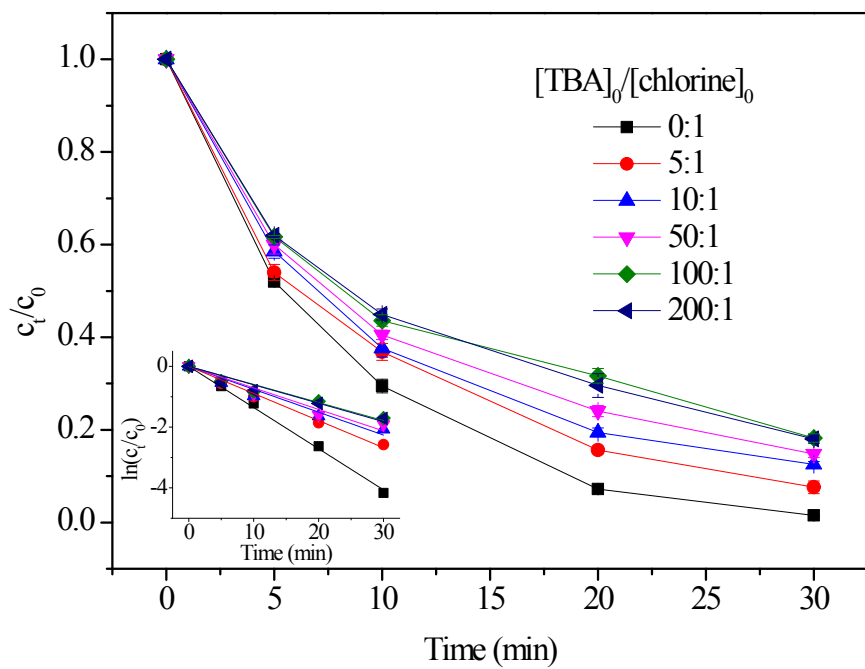

Fig. S2. Effect of different ratios of  $[TBA]_0/[NPX]_0$  on NPX degradation by UV/chlorine process

Conditions:  $[NPX]_0 = 25 \mu\text{M}$ ,  $[\text{chlorine}]_0 = 250 \mu\text{M}$ ,  $[TBA]_0/[\text{chlorine}]_0 = 0\sim 200:1$ ,  
 $\text{pH} = 7$

Table S1 Identified NPX intermediate products using LC/MS/MS in UV/chlorine process.

| Compound | Retention time (min) | m/z | molecular structure                                                                   |
|----------|----------------------|-----|---------------------------------------------------------------------------------------|
| NPX      | 12.41                | 231 | 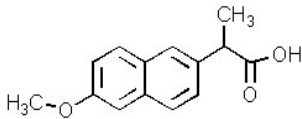    |
| P246     | 7.56, 9.31           | 247 |     |
| P186     | 11.87                | 187 |    |
| P184     | 12.54                | 185 |   |
| P200     | 13.08                | 201 |  |
| P204     | 7.56                 | 205 |  |
| P264     | 8.64                 | 265 |   |
| P299     | 16.04                | 300 |   |
| P134     | 1.50                 | 135 |  |

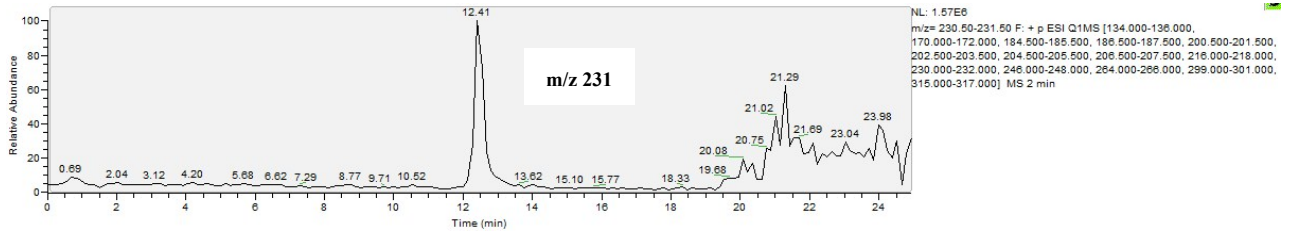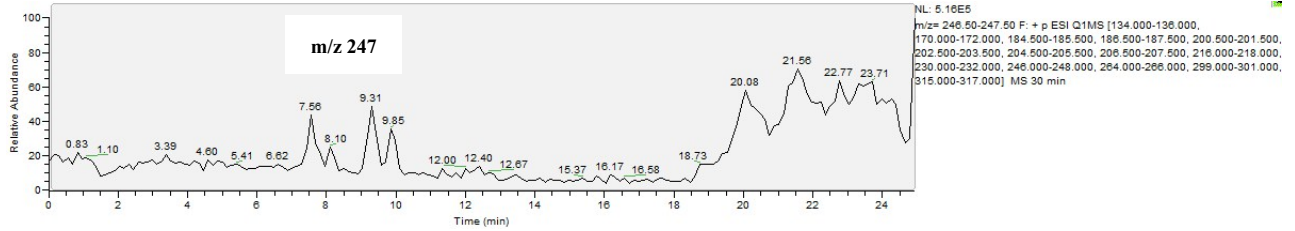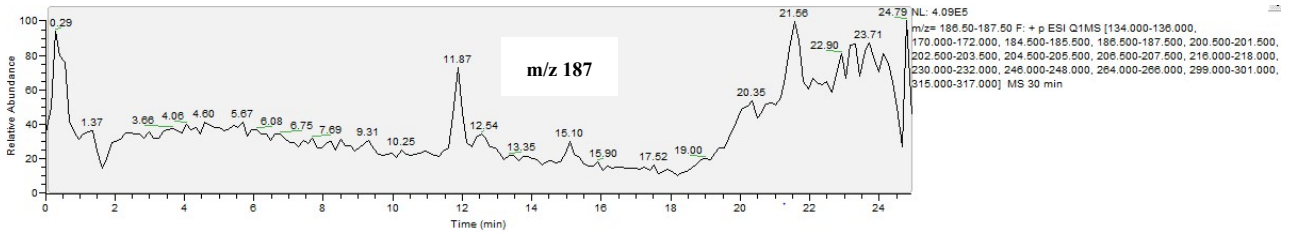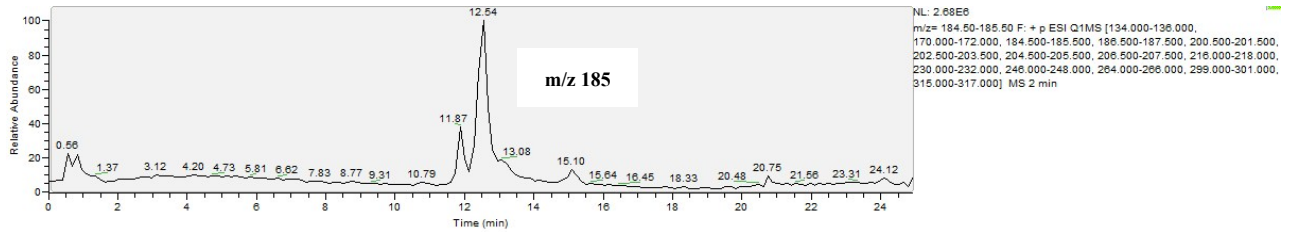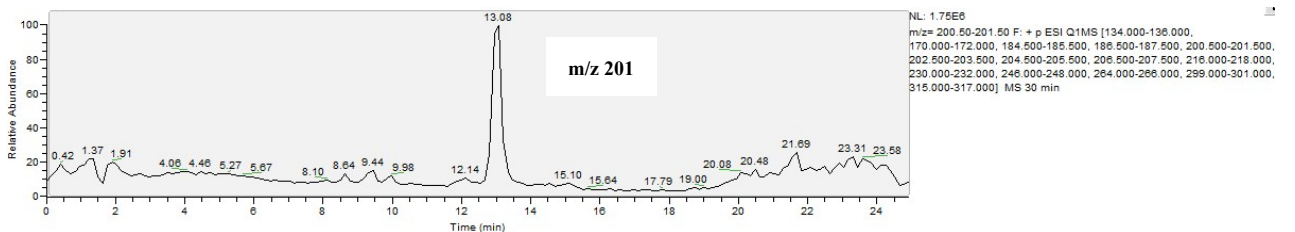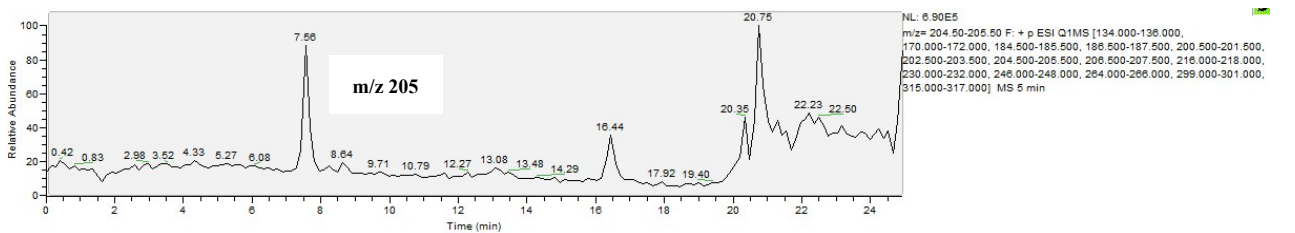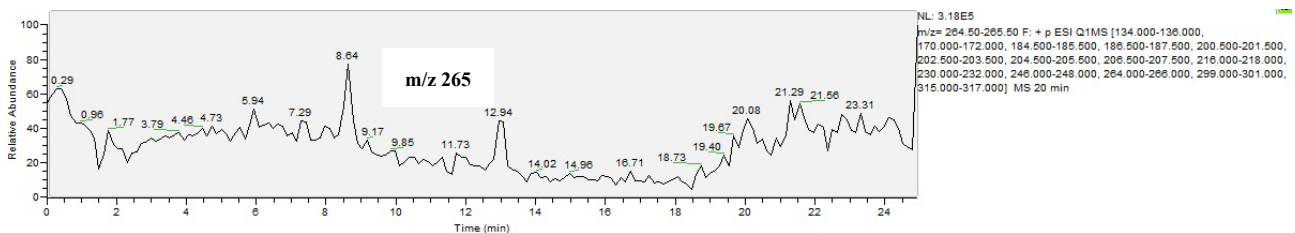

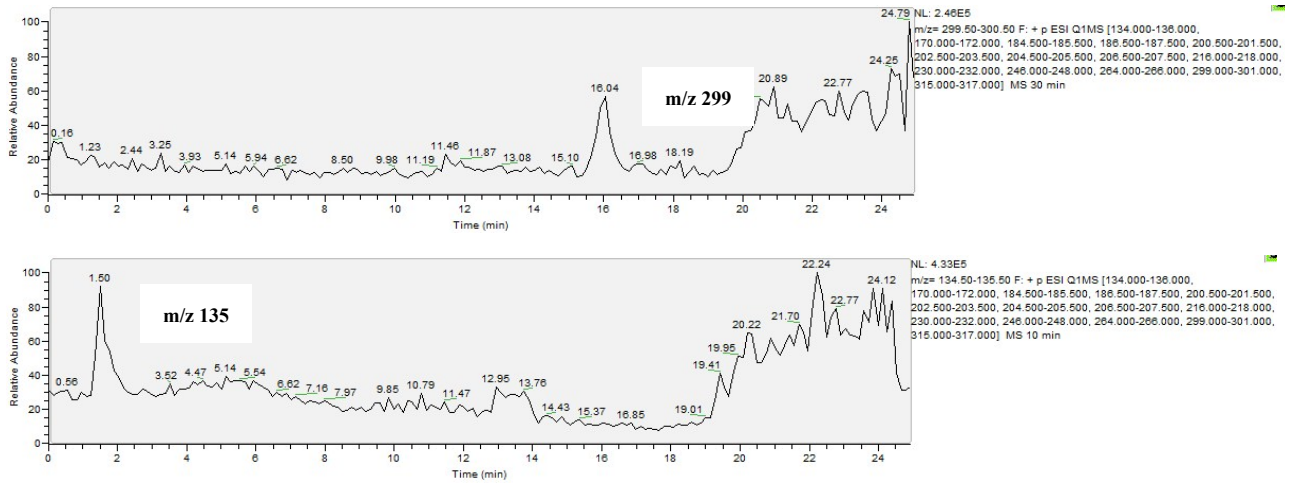

**Fig. S3.** The LC/MS scan of byproducts of NPX formed during UV/chlorine process by extracting the m/z of ions.

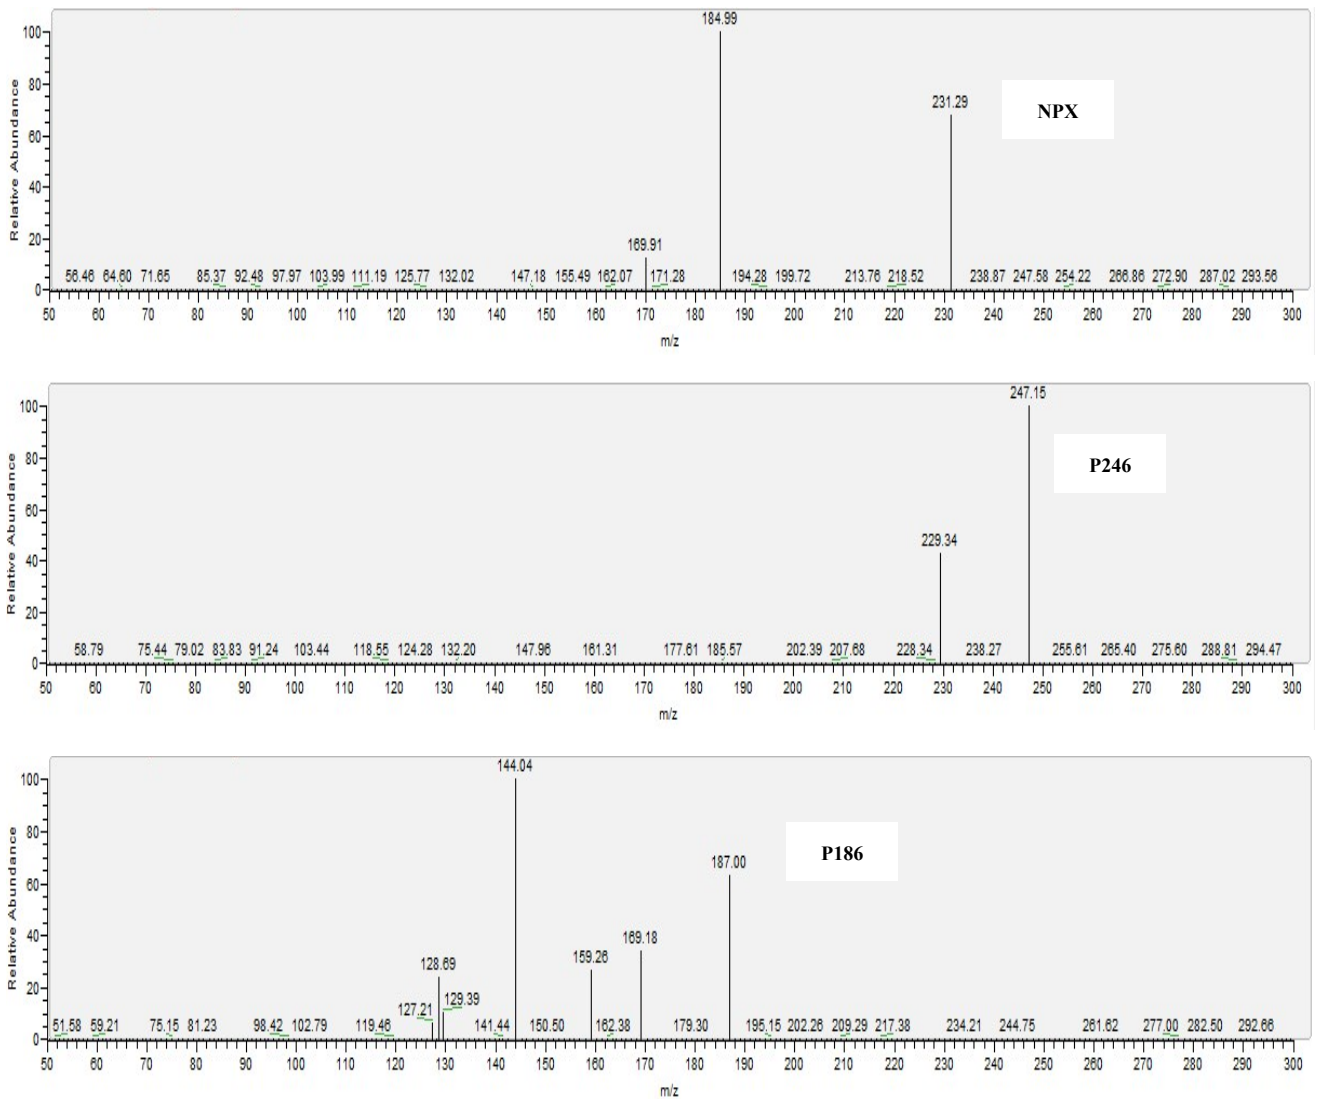

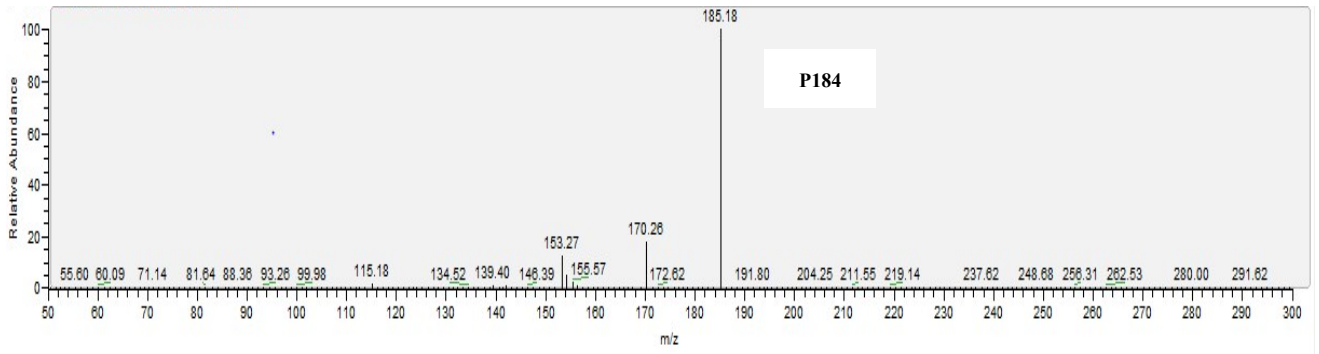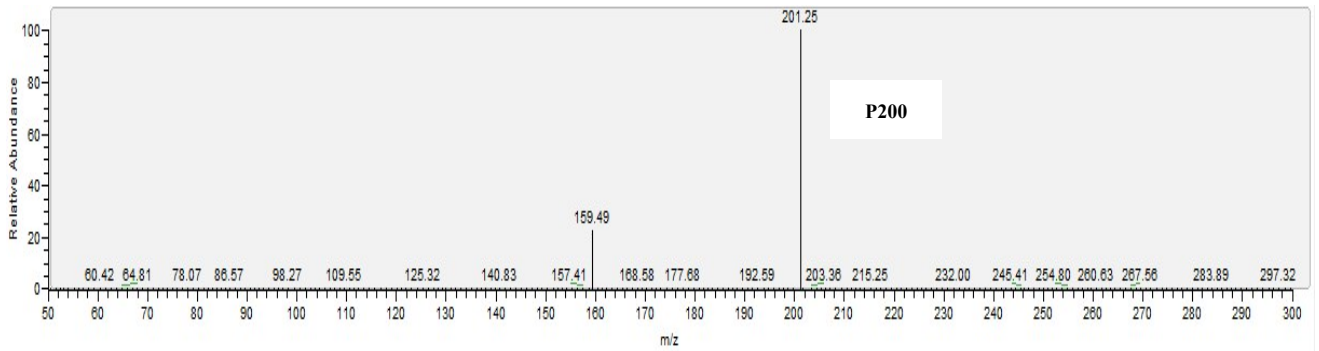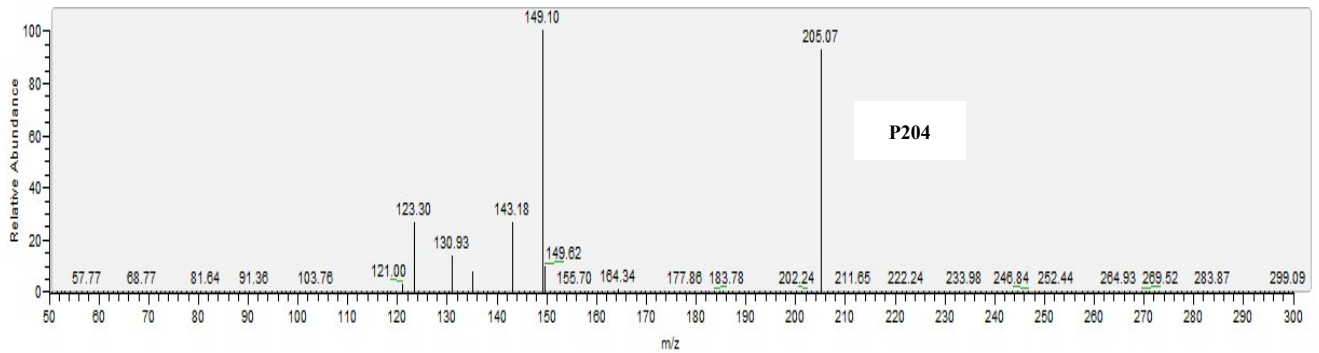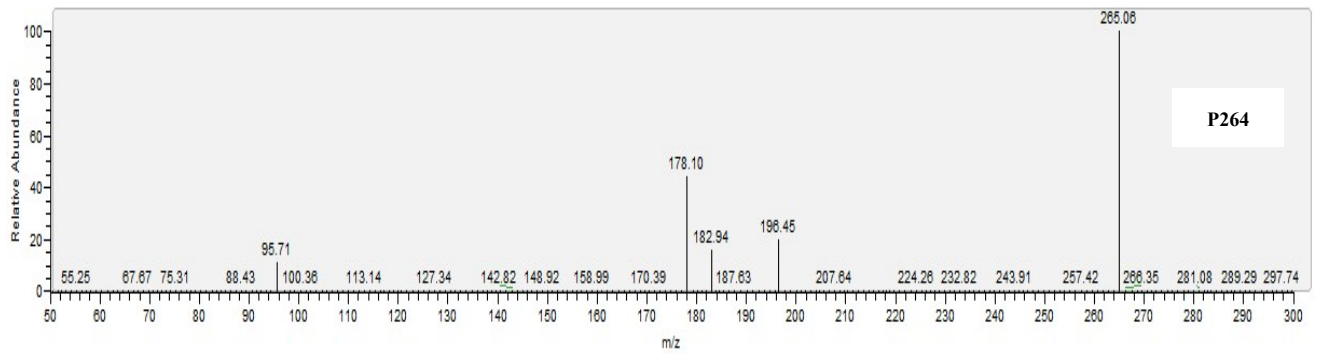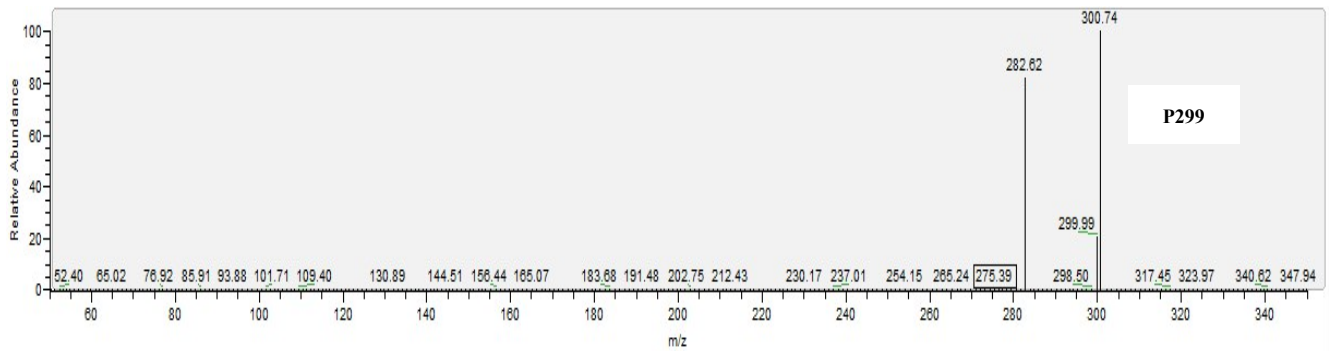

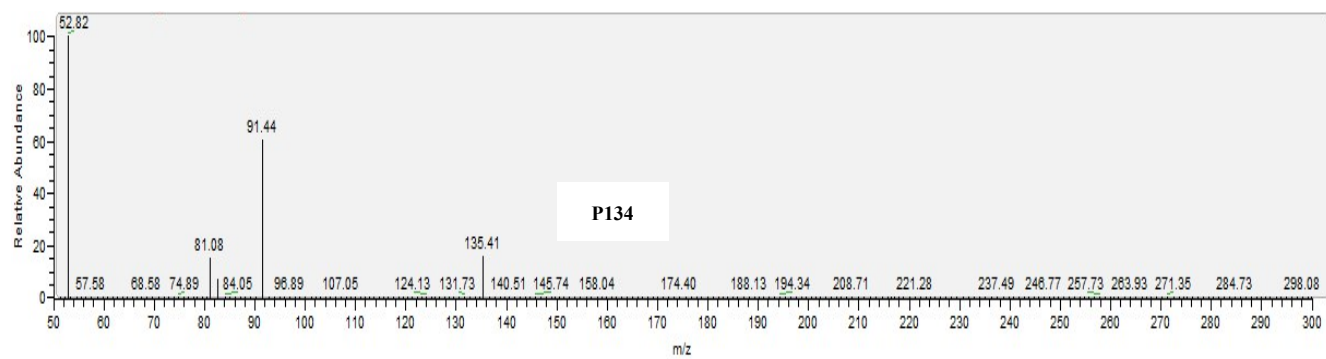

**Fig. S4.** Mass spectra of NPX and its products.
